# Supplementary material for: Circular RNA circDDX17 suppression to gastric cancer progression via the sponging miR-1208/miR-1279/FKBP5 axis encodes a novel circDDX17-63aa protein
Source: Research Square preprint supplement (doi:10.21203/rs.3.rs-4746391/v1), 2024-10-10
Supplement: Supplementary file 1 [file 7edc809fb227f7f1b1a41a94.docx]

| Primers | Sequences（5'-3'） |
| --- | --- |
| CircDDX17-F | ATTTCCGTTGGCTCTTAGTG |
| CircDDX17-R | CCTCTTGCTCCAAATGATTG |
| circDDX17-mRNA-F | ATTTGGAGCAAGAGGTGGTG |
| circDDX17-mRNA-R | CACTAAGAGCCAACGGAAAT |
| GAPDH-F | AGGTGAAGGTCGGAGTCAAC |
| GAPDH-R | GGGTGGAATCATATTGGAACA |
| GAPDH-circ-F | TTGCCCTCAACGACCACTTT |
| GAPDH-circ-R | ACCAAATCCGTTGACTCCGA |
| U6-F | CTCGCTTCGGCAGCACA |
| U6-R | AACGCTTCACGAATTTGCGT |
| 18s-F | ACACGGACAGGATTGACAGA |
| 18s-R | GGACATCTAAGGGCATCACA |
| miR-1208-F | CTCAACTGGTGTCGTGGAGTCGGCAATTCAGTTGAGTCCGCCTG-3 |
| miR-1208-R | ACACTCCAGCTGGGTCACTGTTCAGACA |
| miR-1279-F | CTCAACTGGTGTCGTGGAGTCGGCAATTCAGTTGAGAGAAAGAA |
| miR-1279-R | ACACTCCAGCTGGGTCATATTGCTT |
| FKBP5-F | AACCCCCAGAATAAGGCTGC |
| FKBP5-R | TTGGCGTATATCCTGCGGTC |

Table S3 Primers sequences
